# Supplementary material for: A dual-protection strategy using CMK-3 coated selenium and modified separators for high-energy Al–Se batteries
Source: Royal Society of Chemistry journal article supplement (doi:10.1039/d0qi01302a), 2020-12-10
Supplement: d0qi01302a1.pdf [file d0qi01302a1.pdf]

## Supporting Information

### **Dual-protection strategy by CMK-3 coated selenium and modified separators for high-energy Al-Se batteries**

Haiping Lei,<sup>a,c</sup> Jiguo Tu,<sup>\*a</sup> Wei-Li Song,<sup>b</sup> Handong Jiao,<sup>\*b</sup> Xiang Xiao,<sup>a</sup> and Shuqiang Jiao<sup>a,b</sup>

<sup>a</sup> *State Key Laboratory of Advanced Metallurgy, University of Science and Technology Beijing, Beijing 100083, PR China. E-mail: guo15@126.com*

<sup>b</sup> *Institute of Advanced Structure Technology, Beijing Institute of Technology, Beijing 100081, PR China. E-mail: jiaohandong\_new@163.com*

<sup>c</sup> *School of Metallurgical and Ecological Engineering, University of Science and Technology Beijing, Beijing 100083, PR China.*

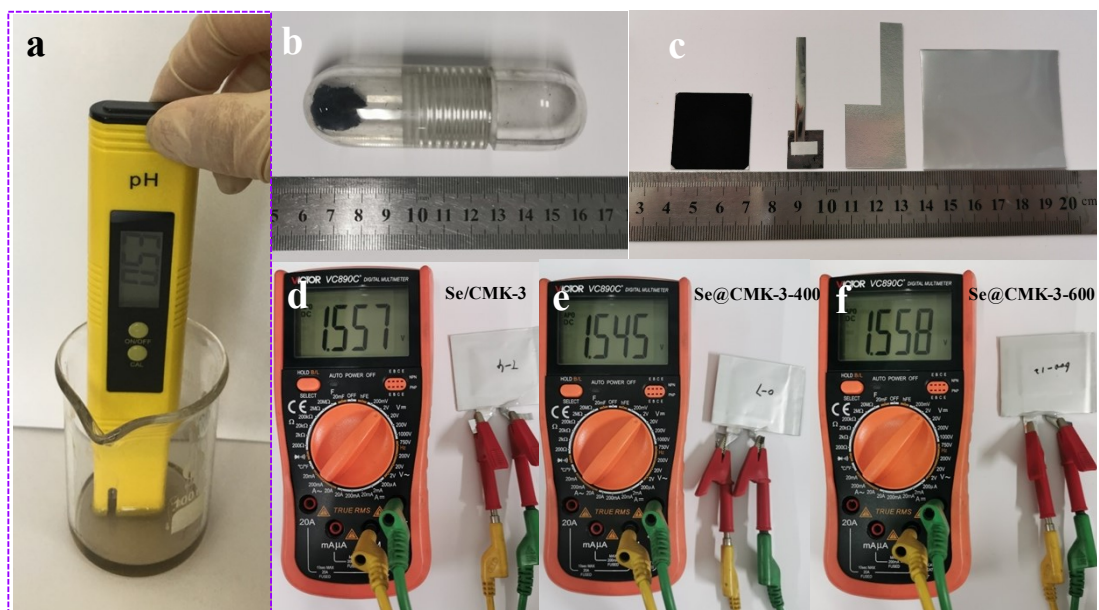

**Figure S1** (a) The pH of the  $\text{AlCl}_3$ /[EMIm]Cl electrolyte with the molar ratio of 1.3:1. (b) Sealed silica envelope. (c) The electrode materials. (d-f) The open circuit potential.

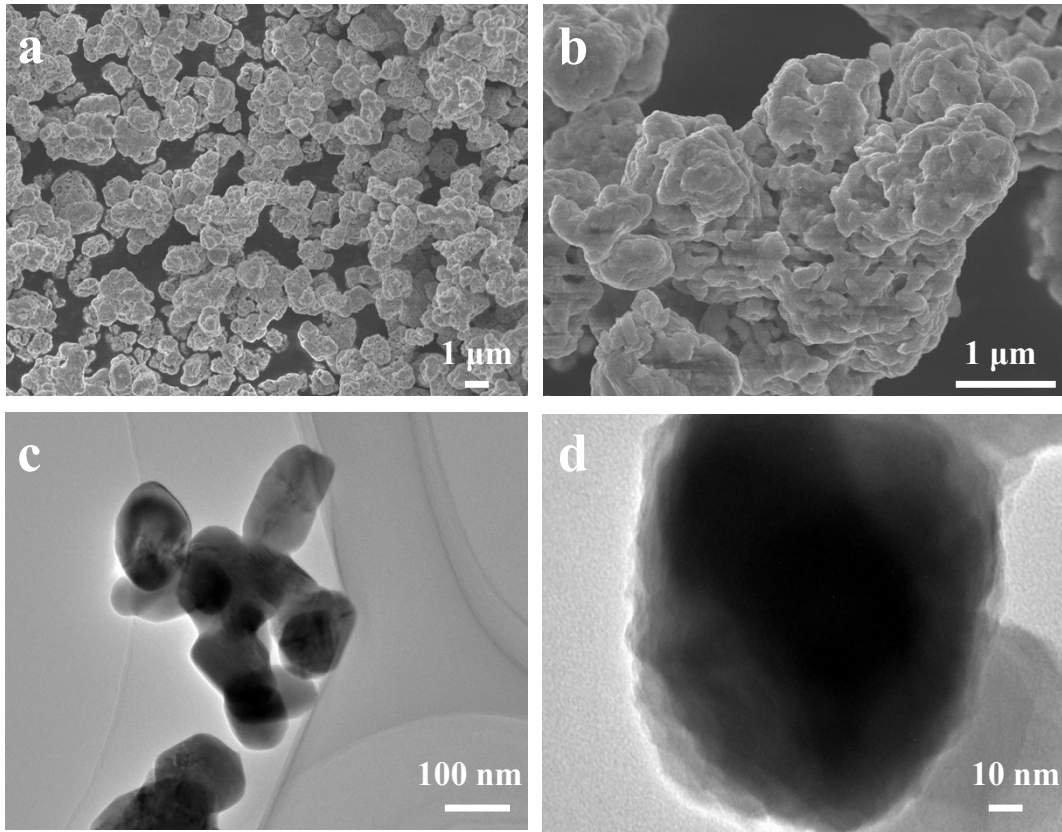

**Figure S2** (a-b) SEM images of original Se. (c-d) TEM images of original Se.

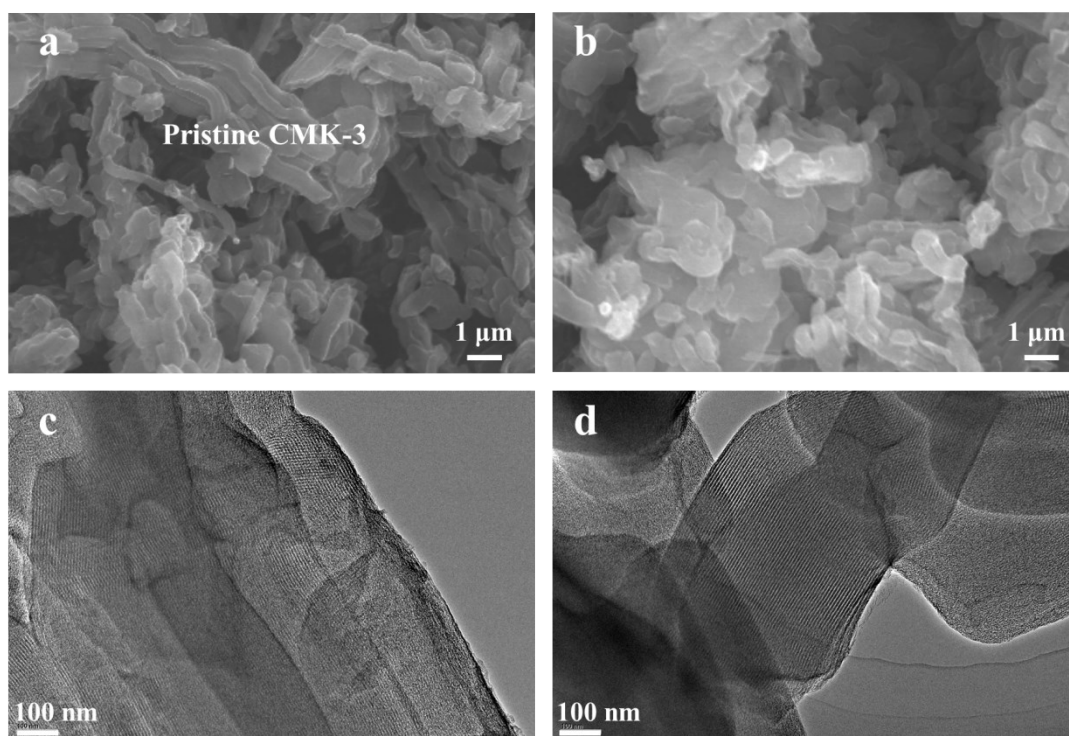

**Figure S3** (a-b) SEM images of pristine CMK-3. (c-d) TEM images of pristine CMK-3.

**Table S1** The Se and C contents of Se/CMK-3, Se@CMK-3-400, and Se@CMK-3-600.

| Samples      |     | C-K   | Se-K  |
|--------------|-----|-------|-------|
| Se/CMK-3     | wt% | 25    | 75    |
|              | at% | 68.67 | 31.33 |
| Se@CMK-3-400 | wt% | 28.8  | 71.20 |
|              | at% | 72.67 | 27.63 |
| Se@CMK-3-600 | wt% | 35.47 | 64.53 |
|              | at% | 78.32 | 21.68 |

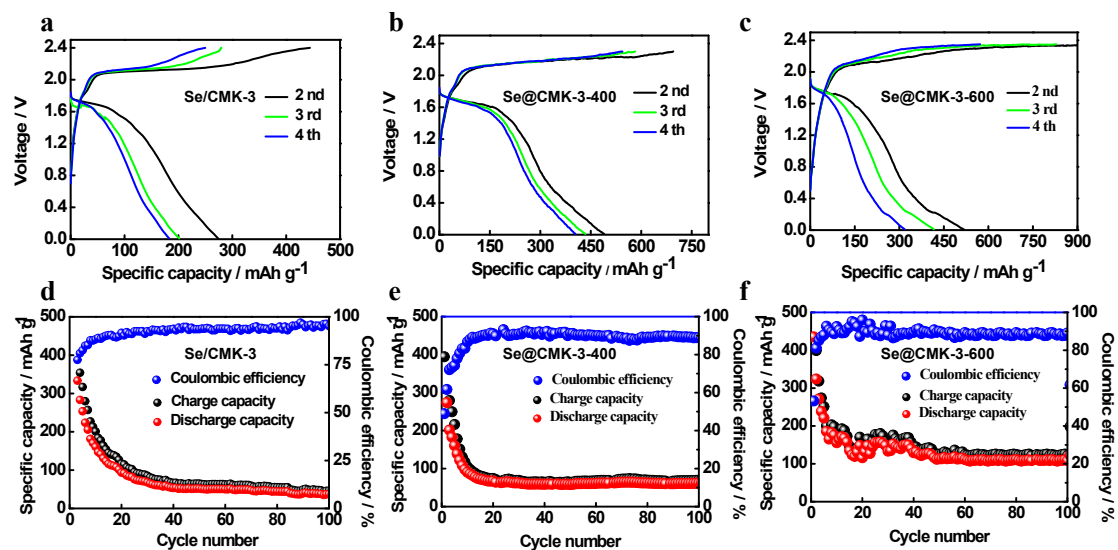

**Figure S4** (a-c) The charge/discharge curves of grinding Se/CMK-3, Se@CMK-3-400, and Se@CMK-3-600 at a current density of 1000 mA g<sup>-1</sup>. (d-f) The corresponding cycling performance.

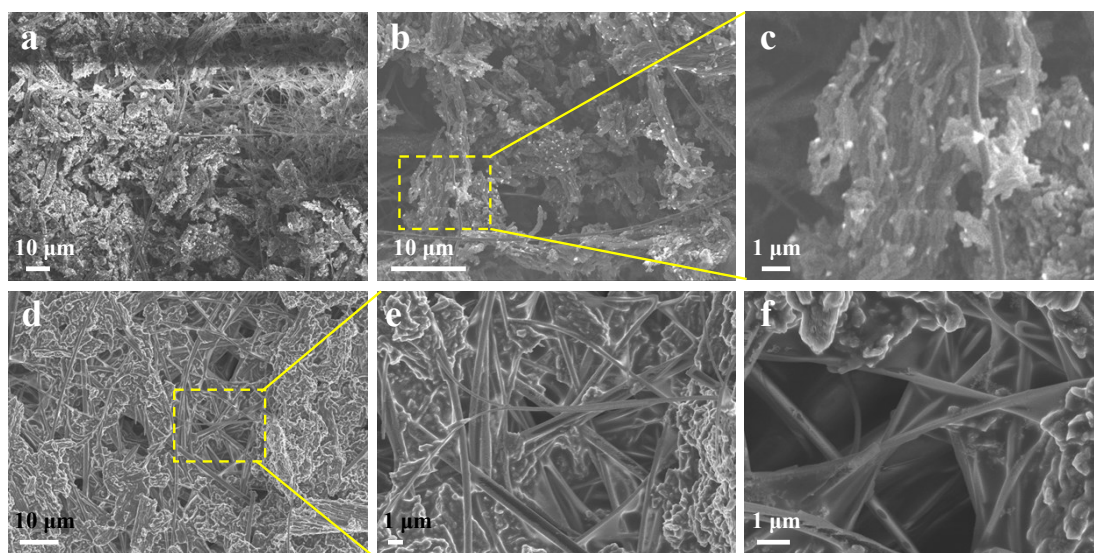

**Figure S5** (a-c) SEM images of pristine CMK-3 modified separator. (d-f) SEM images of cycled CMK-3 modified separator.
